# Supplementary figures and images for: Partially hydrolyzed guar gum enhances colonic epithelial wound healing via activation of RhoA and ERK1/2
Source: Royal Society of Chemistry journal article supplement (doi:10.1039/c6fo00177g), 2016-01-01

# ERK

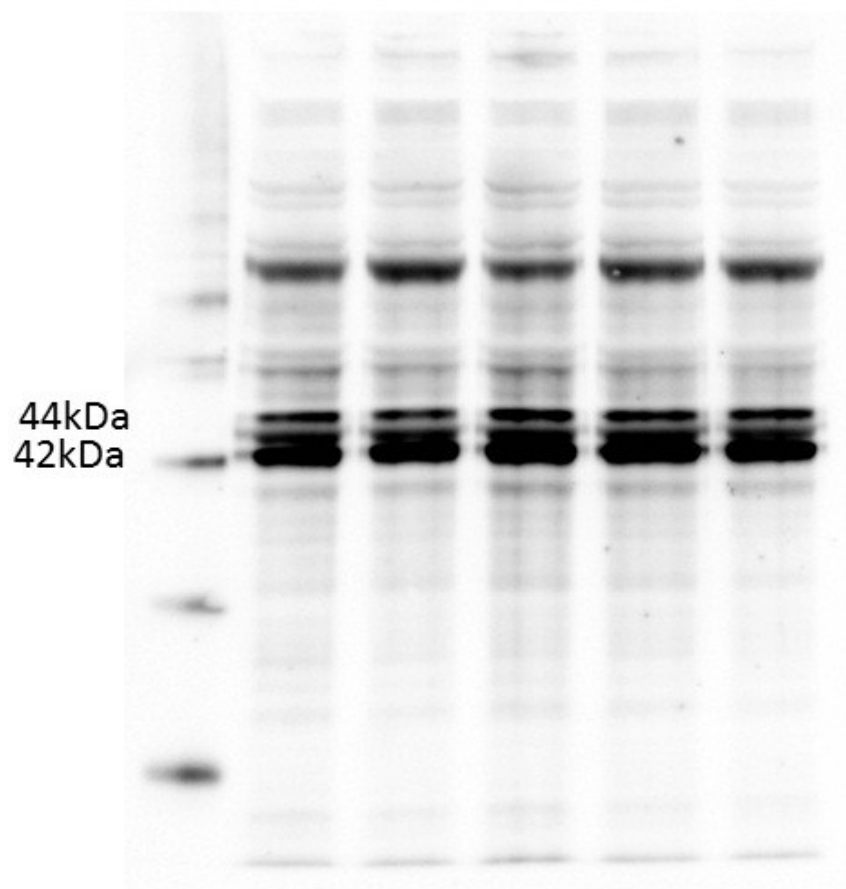

(-) 5min 10min 15min 30min

# pERK

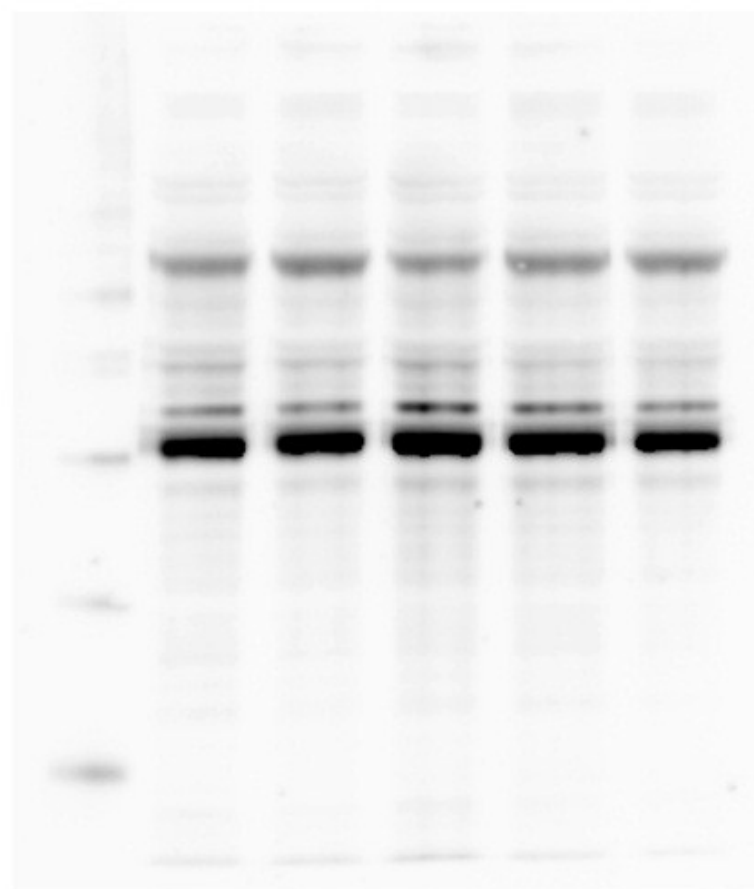

(-) 5min 10min 15min 30min

Supplement: c6fo00177g1.pdf [file c6fo00177g1.pdf]
